# Supplementary material for: MotViz: A Tool for Sequence Motif Prediction in Parallel to Structural Visualization and Analyses
Source: PubMed Central journal article supplement — Genomics Proteomics Bioinformatics. 2012 Mar 23;10(1):35–43. doi: 10.1016/S1672-0229(11)60031-4 (PMC5054496; doi:10.1016/s1672-0229(11)60031-4), 2012-03-23
Supplement: mmc1.pdf [file mmc1.pdf]

## Supplementary Material

Nawaz, M. and Rashid, S. 2012. *MotViz*: a tool for sequence motif prediction in parallel to structural visualization and analyses. *Genomics Proteomics Bioinformatics* 10(1): 35-43.

DOI: [10.1016/S1672-0229\(11\)60031-4](https://doi.org/10.1016/S1672-0229(11)60031-4).

Figure S1

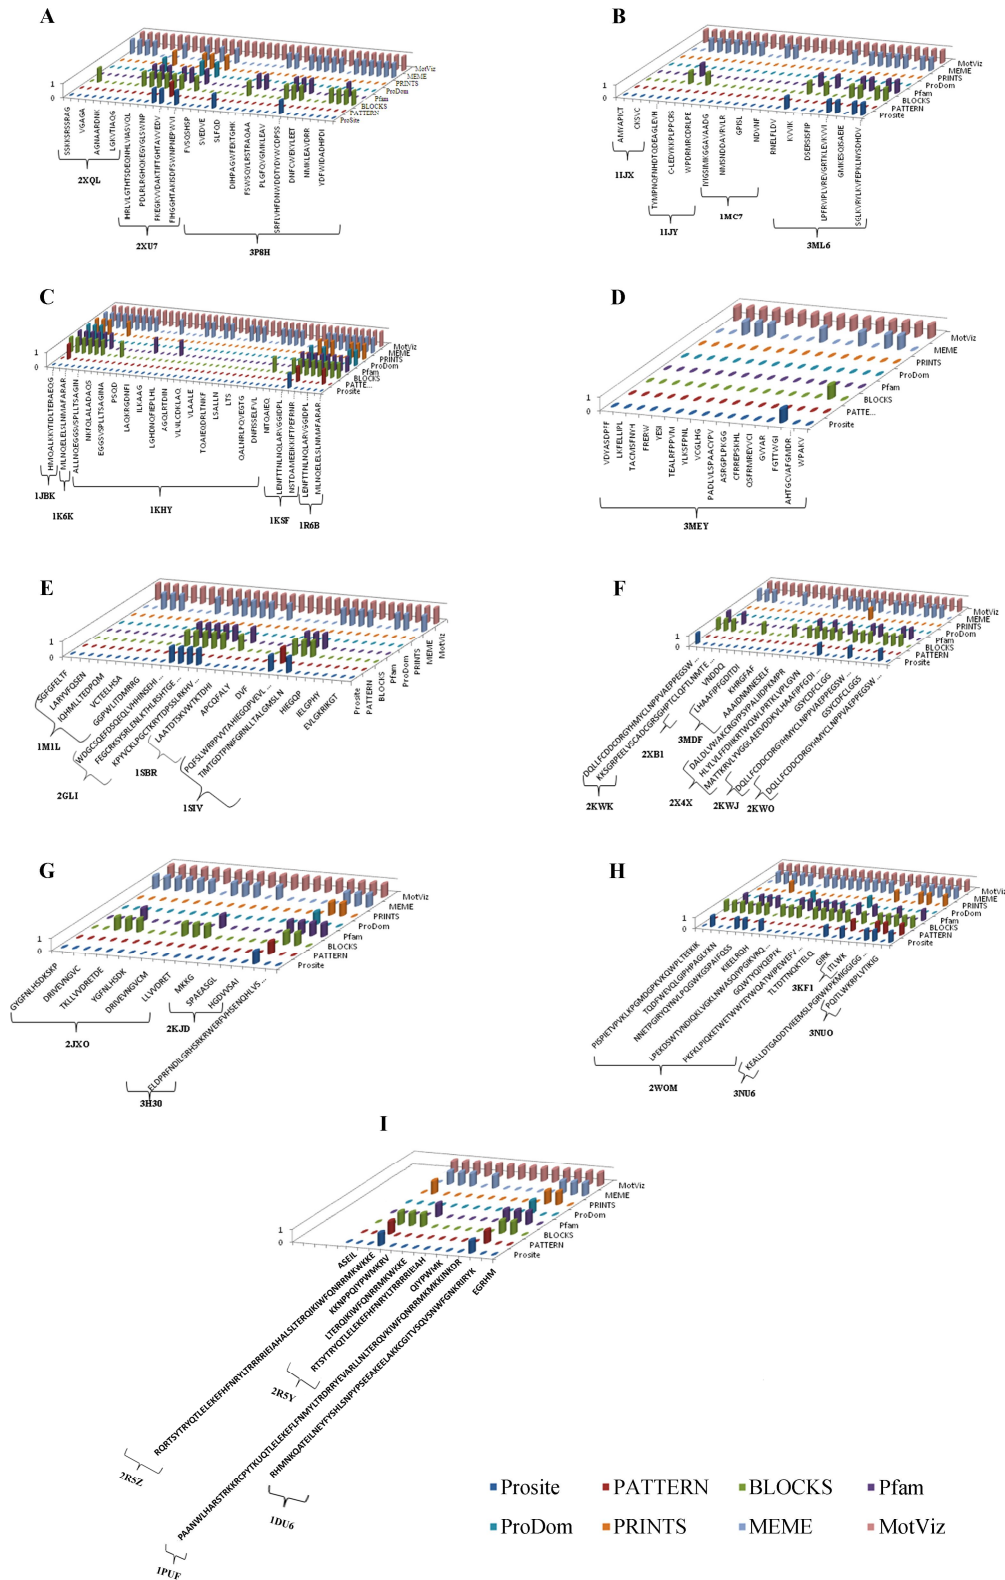

**Figure S1** Graphical overview of predicted motifs by *MotiViz* and other online tools. Graphical overview of predicted motifs by *MotiViz*. The comparison was performed by dataset comprising histone family proteins (A), HSP100 family protein (B), Frizzled family proteins (C), ribosomal family proteins (D), Gli family proteins (E), PHD-finger family proteins (F), Wnt family proteins (G), HIV family proteins (H) and Hox family proteins (I). The predicted motifs by different tools were represented in different colors. The tools include Prosite, PATTERN, BLOCKS, Pfam, ProDom, PRINTS and MEME, respectively. X-axis represents predicted motifs. On Y-axis, the presence and absence of specific motif detected with various tools was indicated as 1 and 0, respectively.
